# Supplementary material for: Meta-QTL analysis and candidate genes for quality traits, mineral content, and abiotic-related traits in wild emmer
Source: Front Plant Sci. 2024 Mar 14;15:1305196. doi: 10.3389/fpls.2024.1305196 (PMC10972855; doi:10.3389/fpls.2024.1305196)
Supplement: Supplementary file 3 [file Table_1.xlsx]

## Sheet: Supplementary Table 1
Supplementary Table 1. Summary of the environmental growing conditions based on the reference used.
Reference	Env	Grow condition	Location	Year	Rainfall/irrigation (mm)	T	Average min T	Average max T
Avni et al. (2018)	4	Field	Rehovot	2014	413
				2016	413/350
				2016	413/750
			Atlit	2015	559
Buerstmayr et al. (2012)	4	Field	IFA-Tulln	2006	not provided
				2006	not provided
				2008	not provided
				2008	not provided
Buerstmayr et al. (2013)	4	Green house	Not provided	2007-2008	not provided
				2008	not provided
				2008/2009	not provided
				2009	not provided
Chen et al. (2021)	4	Field	Southwest University of Science and Technology, China	2017/2018	Not provided
				2018/2019	Not provided
				2019/2020	Not provided
				2020/2021.	Not provided
Deblieck et al. (2022)	4	Green house	Rehovot	2017	350
				2017	650
				2018	201
				2018	384
Fatiukha et al. (2020a)	5	Field	Ein Tamar	2013/2014	66/430
			Kimaron	2014/2015	230/622
			Kimaron	2014/2016	230/208
		Green house	Sharona	2014/2015	448
			Sharona	2014/2016	144
Fatiukha et al. (2020b)	3	Rain protected screenhouse	Rehovot	2004/2005	750
				2004/2005	350
				2006/2007	720
Fatiukha et al. (2021)	2	Rain protected screenhouse		2004/2005	750
			Rehovot	2004/2005	350
Garvin et al. (2009)	3	Green house	Washington	2002	Not provided	19
				2004	Not provided	19
				2004	Not provided	19
Mo et al. (2021)	8	Field	Chongzhou	2017	Not provided
				2018	Not provided
				2019	Not provided
				2020	Not provided
				2021	Not provided
			Wenjiang	2020	Not provided
				2021	Not provided
			Ya’an	2020	Not provided
Peleg et al. (2009a)	3	Rain protected screenhouse	Rehovot	2004/2005	750
				2004/2006	350
				2006/2007	720
Peleg et al. (2009b)	2	Rain protected screenhouse	Rehovot	2004/2005	750		11.5	30
				2004/2006	350		11.5	30
Peleg et al. (2011)	2
Tanah et al. (2013)	1	Green house	Kobe	1999/2000	Not provided
Velu et al. (2017)	3	Field	Sakarya	2012/2013	Not provided
			Kahramanmaras	2012/2013	Not provided
		Green house	Ciudad de Obregon	2012/2013	Not provided
Yan et al. (2018)	3	Rain protected screenhouse	Rehovot	2004/2005	750
				2004/2006	350
				2006/2007	720
Zhou et al.(2021)	6	Field	Chongzhou	2017	Not provided
				2018	Not provided
Field C59:C63		Field		2019	Not provided
				2020	Not provided
			Wenjiang	2020	Not provided
			Ya'an	2020	Not provided

## Sheet: Supplementary Table 2
Supplementary Table 2. Number of projected QTLs per trait and category
Category	Trait	Number of QTLs
Abiotic-related traits	AL	5
	CHL	23
	CIR	30
	CL	15
	DFHM	15
	DFPH	14
	FLL	9
	FLRI	22
	FLW	22
	OPH	10
	PH	1
	SC	1
	Sub-Total	167
Disease-related traits	FHB	28
	Sub-Total	28
Mineral content	G_P_C	23
	GAIC	1
	GAlC	1
	GCaC	25
	GCuC	43
	GFeC	27
	GKC	12
	GMgC	33
	GMnC	8
	GSC	51
	GseC	26
	GZnC	23
	Sub-Total	273
Quality	GPC	85
	GY	10
	HI	31
	HKW	2
	KNPS	9
	SDM	13
	SHT	2
	SL	21
	SL/TSN	2
	SNS	2
	STSP	1
	TDM	3
	TKW	56
	VDM	7
	Sub-Total	244
	Grand Total	712

## Sheet: Supplementary Table 3
Supplementary Table 3. Number of markers and total gentic distance per chromosome
Chromosme	N of Markers	Distance (cM)
1A	1945	167.4
1B	2894	175.85
2A	2155	215.5
2B	3421	195.8
3A	1797	204.41
3B	2573	215.26
4A	1638	175.8
4B	1455	135.8
5A	1919	263.15
5B	2554	359.02
6A	1943	131.2
6B	2536	210.26
7A	2413	209.8
7B	2480	219.8
Grand Total	31723	2879.05
Average	2265.93	205.646
